# Supplementary material
Source: PubMed Central journal article supplement (PMC8713033)

**Cell Reports, Volume 31**

**Supplemental Information**

**The Leucine-Rich Repeat Region of CARMIL1**

**Regulates IL-1-Mediated ERK Activation,**

**MMP Expression, and Collagen Degradation**

**Qin Wang, Karambir Notay, Gregory P. Downey, and Christopher A. McCulloch**

**Supplementary Figure 1. IL-1-induced ERK phosphorylation and MMP3 expression are CARMIL1-dependent. Related to STAR Methods.** A) Immortalized Human gingival fibroblasts- hTERT (CARMIL1 WT) and CARMIL1 deletion by using CRISPR/Cas9 genome editing technology (CARMIL1 KO) were plated on fibronectin (*FN*) for 24 hr, serum starved for 6 hrs., then treated without or with IL-1 (20 ng/ml). Whole cell lysates were immunoblotted for p(T202/Y204)-ERK and total ERK. Lysates of CARMIL1 WT and CARMIL1 KO cells were also immunoblotted for CARMIL1 to confirm CARMIL1 KO,  $\beta$ -Actin was used for loading control. Ratios of p(T202/Y204)-ERK to ERK were quantified by densitometry. Densitometry data were assessed by ANOVA and are expressed as means  $\pm$  SE. B) CARMIL1 WT and CARMIL1 KO cells were treated without or with IL-1 (20 ng/ml) for 6 hr and 24 hr. Total RNA was extracted, and MMP-1, MMP-3, MMP-9 and MMP-14 mRNA levels were quantified by qRT-PCR analysis. Values are mean  $\pm$  SE from  $n = 3$  independent experiments.

**Supplementary Figure 2. Effect of CARMIL1 KD on adhesion formation. Related to STAR Methods.** HGFs were transfected with siRNA Control and siRNA CARMIL1 and plated on FN for 20 min, 40 min, 1 hr and 2 hr in the presence of IL-1 and coimmunostained for CARMIL1 and paxillin. A) Confocal microscopy images of immunofluorescence localization of CARMIL1 (red) and paxillin (green) in cells spreading on FN. B) number of focal adhesions/cell in the cell periphery ( $<5 \mu\text{m}$  from the cell membrane,  $n = 10-15$  cells/group, upper panel), focal adhesions area/cell ( $n = 10-15$  cells/group, middle panel), and length of focal adhesions in cell periphery ( $n = 10-15$  cells/group, lower panel) were evaluated by ImageJ from the paxillin images. Data were quantified using ImageJ. Differences between groups were measured by ANOVA.

**Supplementary Figure 3. Effect of CARMIL1 knock down on cell spreading and extension formation. Related to STAR Methods.** HGFs were transfected with siRNA Control and siRNA CARMIL1 and plated on FN for 20 min, 40 min, 1 hr and 2 hr in the presence of IL-1 and coimmunostained for CARMIL1 and phalloidin. A) Confocal microscopy images of immunofluorescence of CARMIL1 (red) and phalloidin (actin signals, blue) in cells spreading on FN. B) Cell surface area ( $n = 10-15$  cells/group, upper panel), number of extensions/cell ( $n = 10-15$  cells/group, middle panel), and length of cell extension ( $n = 10-15$  cells/group, lower panel) were evaluated by ImageJ from the phalloidin images. Data were quantified using ImageJ. Differences between groups were measured by ANOVA.

**Supplementary Figure 4. Effect of CARMIL1 knock out on adhesion formation and cell spreading. Related to STAR Methods.** CARMIL1 deletion by using CRISPR/Cas9 genome editing technology (CARMIL1 KO) and immortalized Human gingival fibroblasts- hTERT (CARMIL1 WT) and were plated on fibronectin (*FN*) for 30 min, 2 hr, and 5 hr in the presence of IL-1 and coimmunostained for CARMIL1, paxillin and phalloidin. A) Confocal microscopy images of immunofluorescence localization of CARMIL1 (red) paxillin (green) in cells spreading on fibronectin. B) Number of focal adhesions/cell in the cell periphery ( $<5 \mu\text{m}$  from the cell membrane,  $n = 10-15$  cells/group, left upper panel), length of focal adhesions in cell periphery ( $n = 10-15$  cells/group, right upper panel), number of extensions/cell ( $n = 10-15$  cells/group, left lower panel), and length of cell extension ( $n = 10-15$  cells/group, right lower panel), were evaluated by ImageJ from the paxillin images. Data were quantified using ImageJ. Differences between groups were measured by ANOVA.

Supplementary Figure 1

**A**

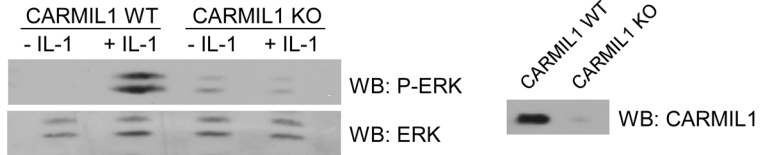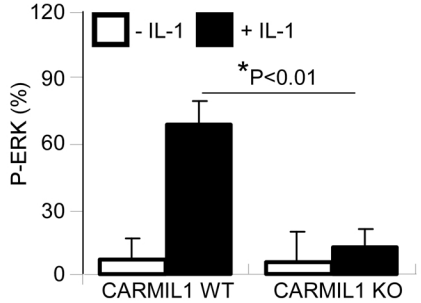

**B**

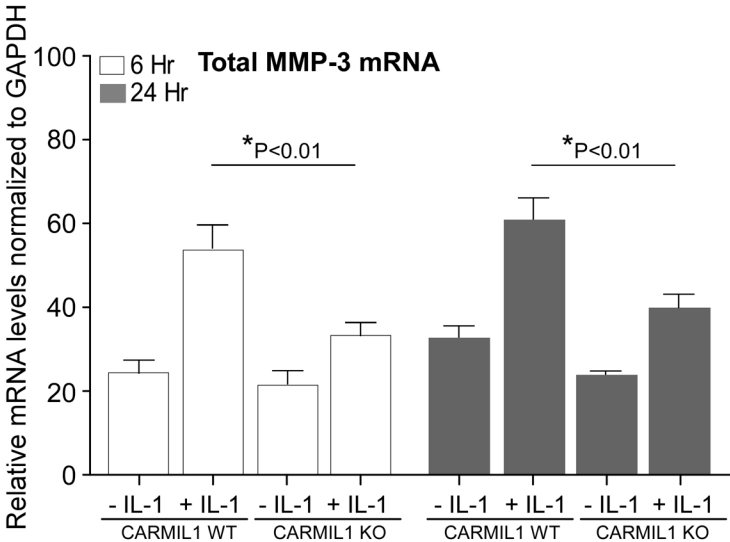

# Supplementary Figure 2

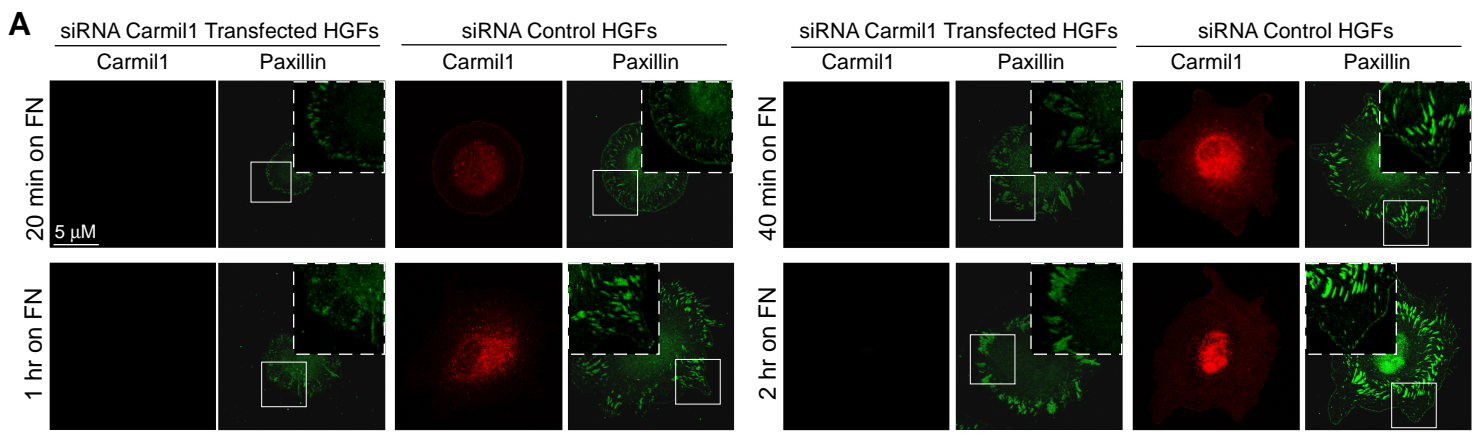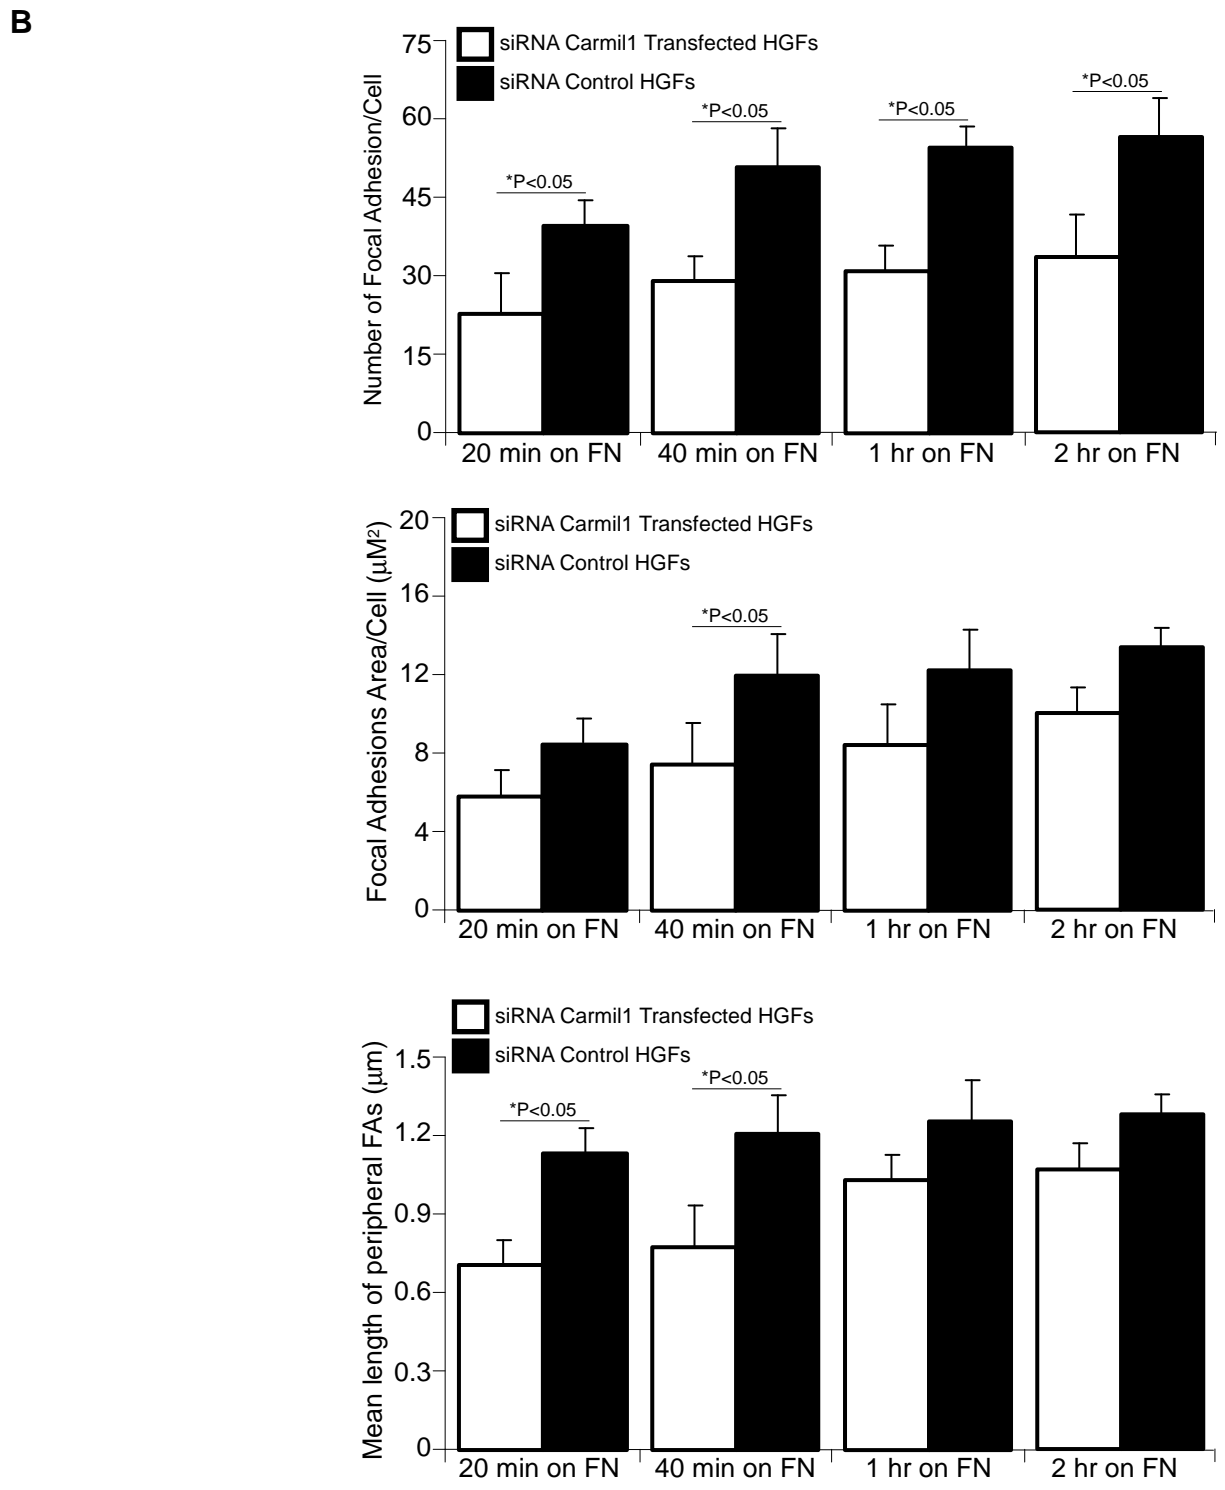

# Supplementary Figure 3

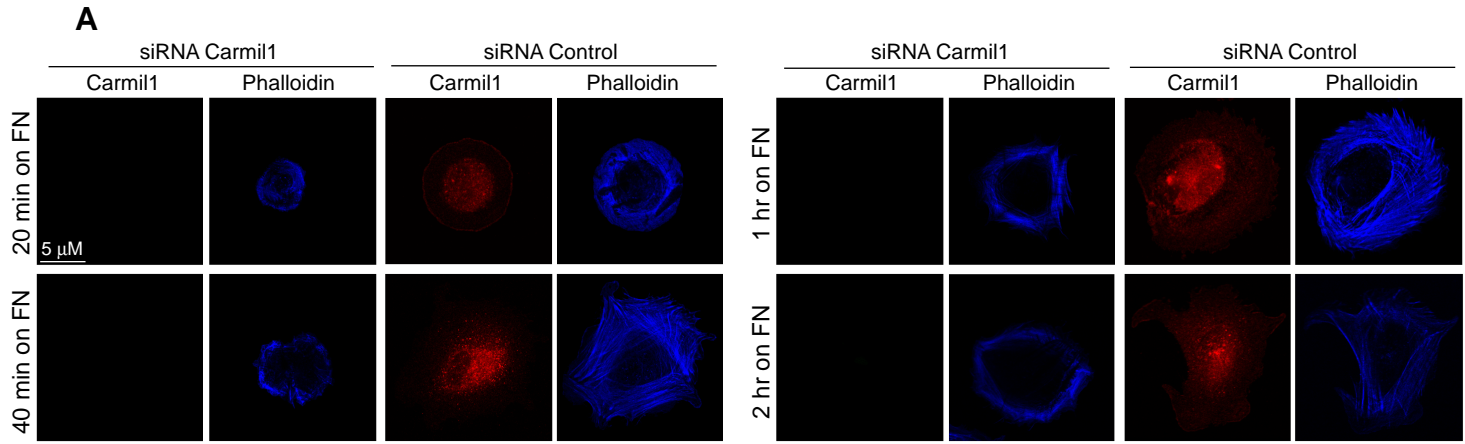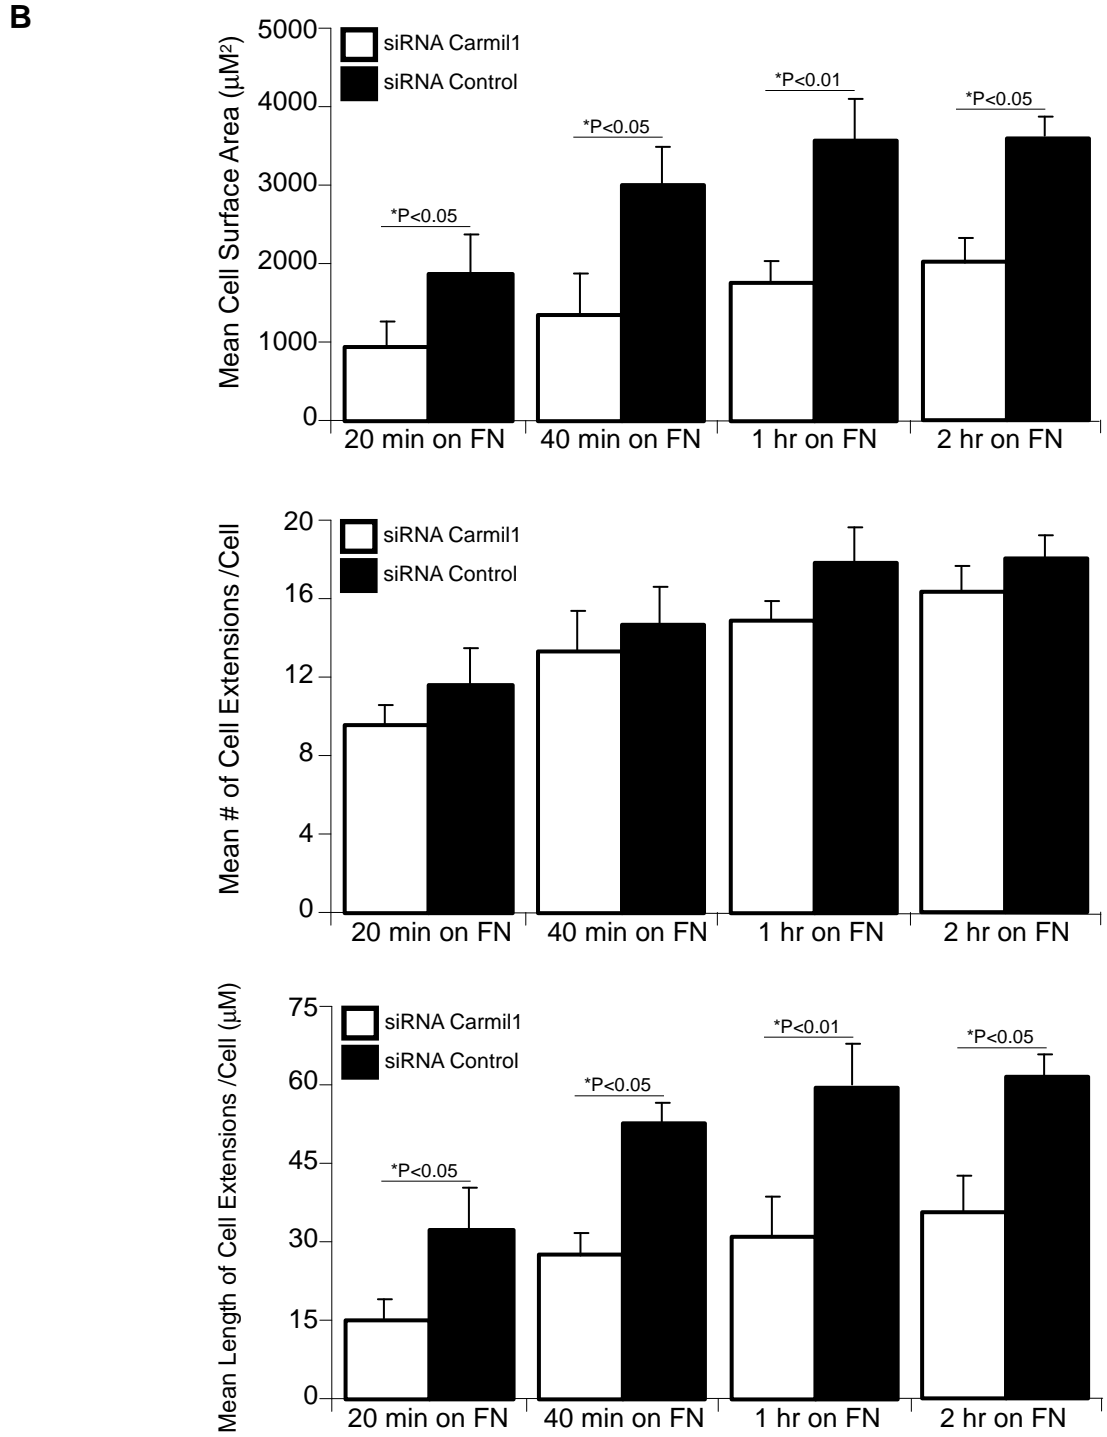

**Supplementary Figure 4**

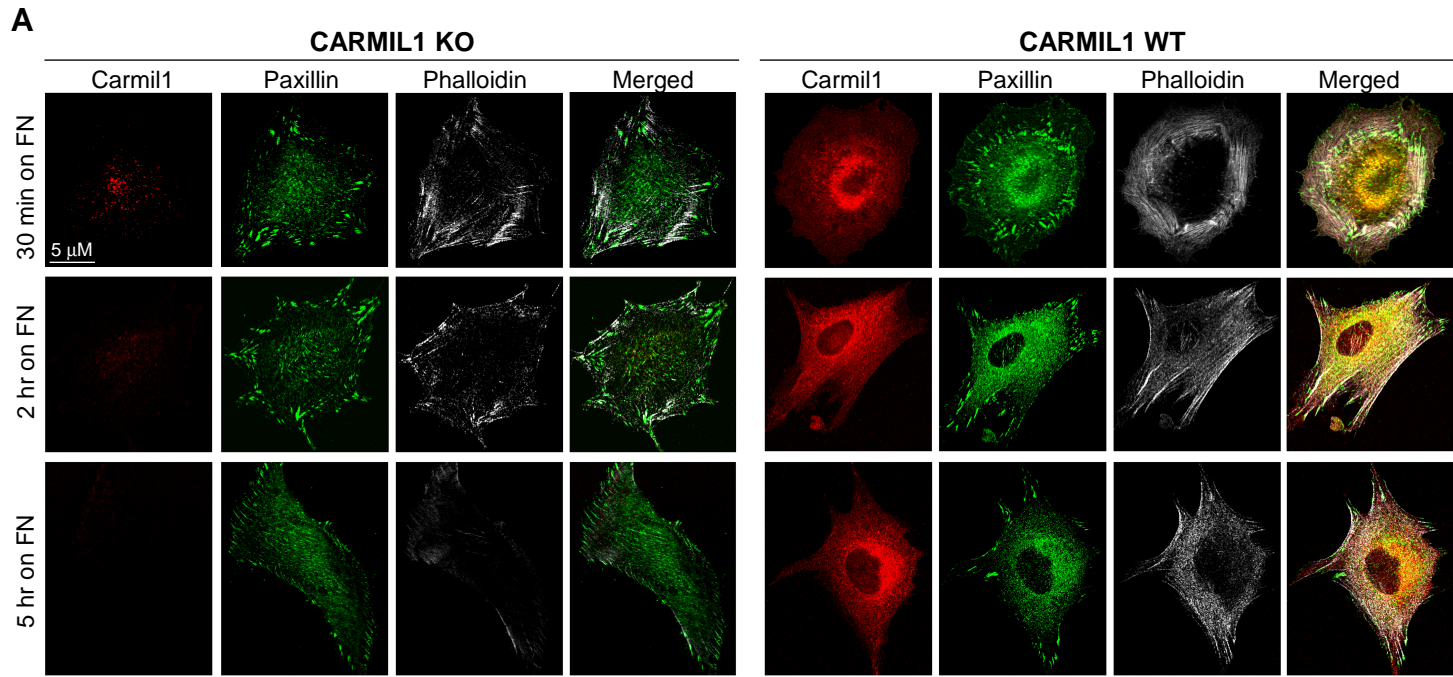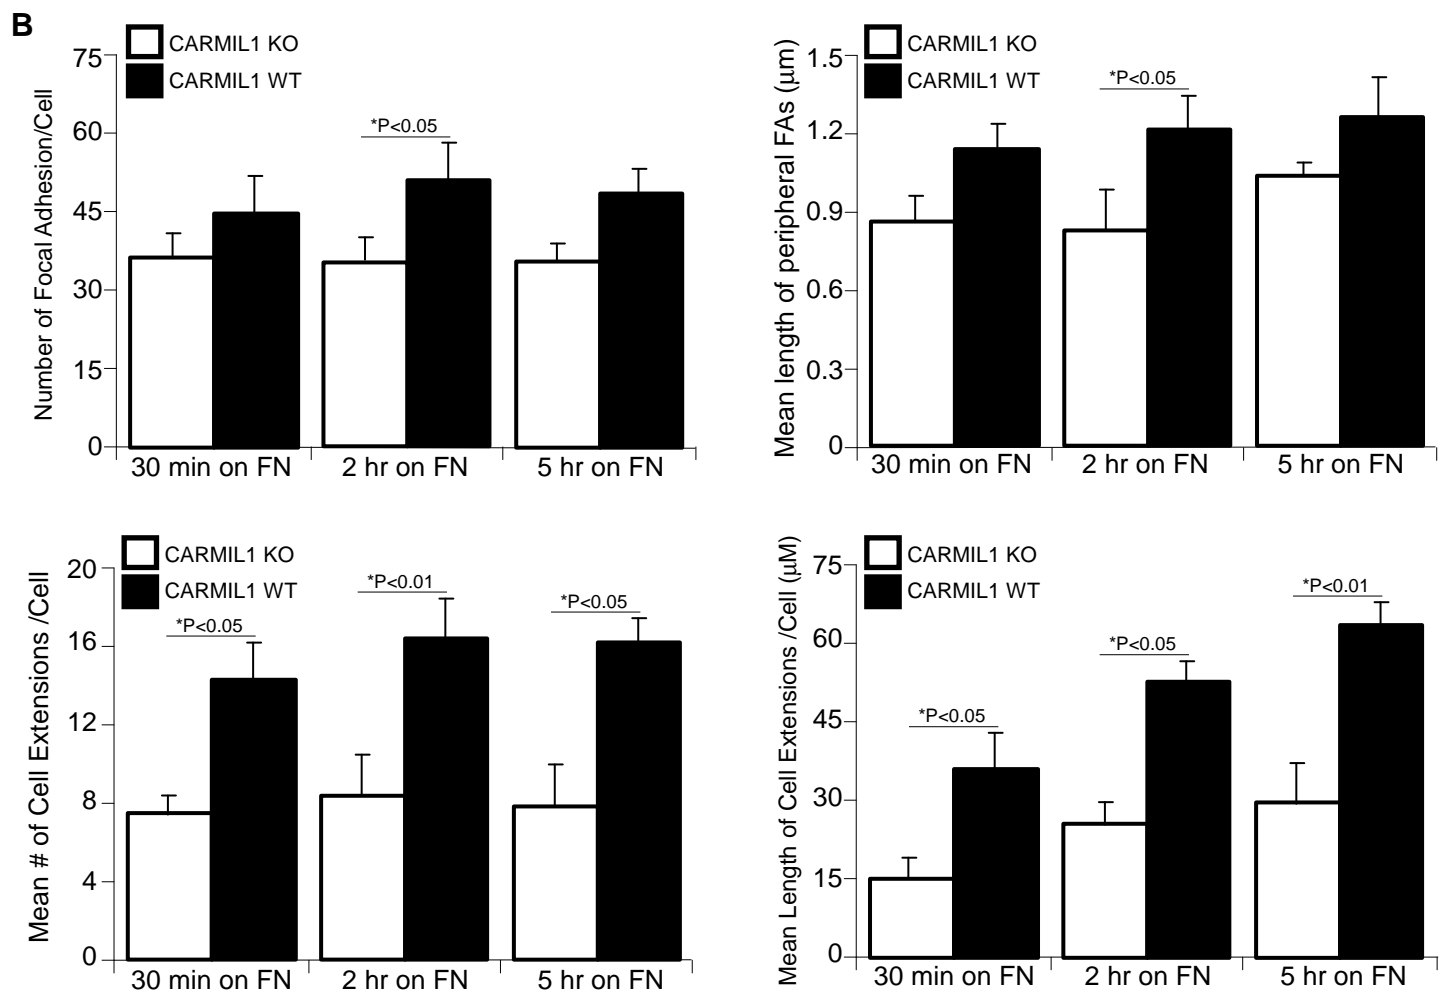

Supplement: NIHMS1761406-supplement-1.pdf [file NIHMS1761406-supplement-1.pdf]
